# Supplementary material
Source: PubMed Central journal article supplement (PMC3603580)

Figure S4

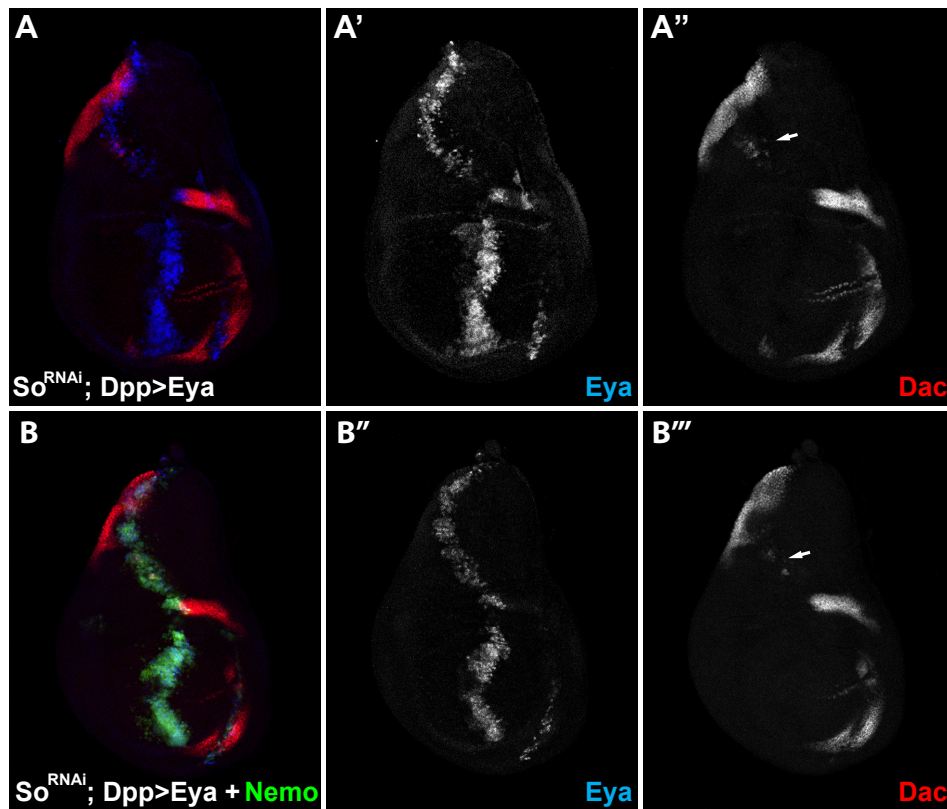

Supplement: NIHMS361215-supplement-04.pdf [file NIHMS361215-supplement-04.pdf]
